# Supplementary material for: Microbiota-induced obesity requires farnesoid X receptor
Source: PubMed Central journal article supplement — Gut. 2016 Jan 6;66(3):429–37. doi: 10.1136/gutjnl-2015-310283 (PMC5534765; doi:10.1136/gutjnl-2015-310283), 2016-01-06
Supplement: gutjnl-2015-310283supp001.pdf [file gutjnl-2015-310283supp001.pdf]

**Table S1. Antibodies used for histology, related to Materials and Methods**

| Antibody                                           | Application | primary/<br>secondary | raised in  | dilution | Supplier                                |
|----------------------------------------------------|-------------|-----------------------|------------|----------|-----------------------------------------|
| MAC-2/galectin-3                                   | WAT         | primary               | Rat        | 1/500    | Cedarlane<br>Laboratories,<br>#CL8942AP |
| rabbit biotinylated anti-rat                       | WAT         | secondary             | Rabbit     | 1/500    | Vector<br>laboratories,<br>#VEBA-4001   |
| Polyclonal Guinea Pig Anti-<br>Insulin             | pancreas    | primary               | Guinea pig | 1/800    | DAKO, #A0564                            |
| Biotinylated Goat Anti-<br>Guinea Pig IgG Antibody | pancreas    | secondary             | Goat       | 1/800    | Vector<br>laboratories,<br>#BA-7000     |
