# Supplementary material for: Microbiota-induced obesity requires farnesoid X receptor
Source: PubMed Central journal article supplement — Gut. 2016 Jan 6;66(3):429–37. doi: 10.1136/gutjnl-2015-310283 (PMC5534765; doi:10.1136/gutjnl-2015-310283), 2016-01-06
Supplement: gutjnl-2015-310283supp002.pdf [file gutjnl-2015-310283supp002.pdf]

**Table S2. Primer sequences for qRT-PCR**

| Gene                                                                                        | Abbreviation  | Primer sequence                                        |
|---------------------------------------------------------------------------------------------|---------------|--------------------------------------------------------|
| Acetyl-CoA carboxylase                                                                      | <i>Acc1</i>   | AAGTCCTTGGTCGGGAAGTATACA<br>ACTCCCTCAAAGTCATCACAAACA   |
| Acyl-CoA oxidase 1                                                                          | <i>Acox1</i>  | CCGCCACCTTCAATCCAGAG<br>CAAGTTCTCGATTTCTCGACGG         |
| Apolipoprotein C2/Apolipoprotein C-II                                                       | <i>Apoc2</i>  | CCCTTCCTGCCACTACATTC<br>CAACATCAGGATGACCAGGA           |
| Cluster of differentiation 36/fatty acid translocase                                        | <i>Cd36</i>   | TTGTACCTATACTGTGGCTAAATGAGA<br>CTTGTGTTTGAACATTTCTGCTT |
| Carnitine palmitoyltransferase 1A                                                           | <i>Cpt1a</i>  | TGCCTCTATGTGGTGTCCAA<br>TCAAACAGTTCCACCTGCTG           |
| Cytochrome P450, family 7, subfamily A, polypeptide 1 (Cholesterol 7 $\alpha$ -hydroxylase) | <i>Cyp7a1</i> | AGCAACTAAACAACCTGCCAGTACTA<br>GTCCGGATATTC AAGGATGCA   |
| Cytochrome P450, family 8, subfamily B, polypeptide 1 (Sterol 12 $\alpha$ -hydroxylase)     | <i>Cyp8b1</i> | GGCTGGCTTCCTGAGCTTATT<br>ACTTCCTGAACAGCTCATCGG         |
| EGF-like module-containing mucin-like hormone receptor-like 1                               | <i>Emr1</i>   | GGAGGACTTCTCCAAGCCTATT<br>AGGCCTCTCACTTCTGCTT          |
| Fatty acid synthetase                                                                       | <i>Fas</i>    | TGGTGAATTGTCTCCGAAAAGA<br>CACGTTTCATCACGAGGTCATG       |
| Peroxisome proliferator-activated receptor alpha                                            | <i>Ppara</i>  | CACGCATGTGAAGGCTGTAA<br>GCTCCGATCACACTTGTCTG           |
| Scavenger receptor class B member 1                                                         | <i>Srb1</i>   | CGTTGTCATGATCCTCATGTT<br>ACAGGCTGCTCGGGTCTAT           |
| Serum amyloid A 3                                                                           | <i>Saa3</i>   | TGCCATCATTCTTTGCATCTTGA<br>CCGTGAACCTTCTGAACAGCCT      |
| Tumor necrosis factor $\alpha$                                                              | <i>Tnfa</i>   | CCAGACCCTCACACTCA<br>CACTTG GTGGTTTGTACGAC             |
| Very-low-density-lipoprotein receptor                                                       | <i>Vldlr</i>  | GCCC GTTCTACTCAGTGTATCC<br>GAACTCATCTGCACTACATGTTATGTT |
