# Supplementary material for: Microbiota-induced obesity requires farnesoid X receptor
Source: PubMed Central journal article supplement — Gut. 2016 Jan 6;66(3):429–37. doi: 10.1136/gutjnl-2015-310283 (PMC5534765; doi:10.1136/gutjnl-2015-310283), 2016-01-06
Supplement: gutjnl-2015-310283supp003.pdf [file gutjnl-2015-310283supp003.pdf]

**Table S3. 2-way ANOVA followed by Bonferroni post-tests, related to figures 1-3 and Supplementary figure 1**

| <b>Figure 1</b>                           | <b>B) Body weight after high fat diet</b> |          | <b>C) Fasting glucose</b> |          | <b>D) AUC, oral glucose tolerance test</b> |          |
|-------------------------------------------|-------------------------------------------|----------|---------------------------|----------|--------------------------------------------|----------|
| Source of Variation                       | % of total variation                      | P value  | % of total variation      | P value  | % of total variation                       | P value  |
| Interaction                               | 21,17                                     | < 0,0001 | 0,06702                   | 0,8239   | 0,4513                                     | 0,4689   |
| Genotype (WT/ <i>Fxr</i> <sup>-/-</sup> ) | 7,349                                     | 0,0105   | 45,14                     | < 0,0001 | 51,07                                      | < 0,0001 |
| Colonization (GF/CONV-R)                  | 37,86                                     | < 0,0001 | 26,41                     | 0,0002   | 30,97                                      | < 0,0001 |

| <b>Figure 1</b>                           | <b>E) AUC, Insulin tolerance test</b> |          | <b>I) Beta cell mass</b> |         |
|-------------------------------------------|---------------------------------------|----------|--------------------------|---------|
| Source of Variation                       | % of total variation                  | P value  | % of total variation     | P value |
| Interaction                               | 2,119                                 | 0,1618   | 12,85                    | 0,05    |
| Genotype (WT/ <i>Fxr</i> <sup>-/-</sup> ) | 42,07                                 | < 0,0001 | 3,189                    | 0,3128  |
| Colonization (GF/CONV-R)                  | 13,83                                 | 0,0008   | 17,92                    | 0,0228  |

| <b>Figure 2</b>                           | <b>B) Crown-like structures</b> |         | <b>C) <i>Emr1</i> mRNA levels</b> |         |
|-------------------------------------------|---------------------------------|---------|-----------------------------------|---------|
| Source of Variation                       | % of total variation            | P value | % of total variation              | P value |
| Interaction                               | 17,99                           | 0,0058  | 15,59                             | 0,0045  |
| Genotype (WT/ <i>Fxr</i> <sup>-/-</sup> ) | 3,03                            | 0,2247  | 10,86                             | 0,015   |
| Colonization (GF/CONV-R)                  | 32,38                           | 0,0005  | 27,13                             | 0,0004  |

  

| <b>Figure 2</b>                           | <b>D) <i>Saa3</i> mRNA levels</b> |          | <b>E) <i>Tnfa</i> mRNA levels</b> |         |
|-------------------------------------------|-----------------------------------|----------|-----------------------------------|---------|
| Source of Variation                       | % of total variation              | P value  | % of total variation              | P value |
| Interaction                               | 15,22                             | 0,0053   | 15,08                             | 0,0362  |
| Genotype (WT/ <i>Fxr</i> <sup>-/-</sup> ) | 8,397                             | 0,0311   | 1,289                             | 0,5209  |
| Colonization (GF/CONV-R)                  | 36,51                             | < 0,0001 | 14,05                             | 0,0425  |

| <b>Figure 3</b>                           | <b>A) Triglycerides</b> |          | <b>B) Cholesteryl esters</b> |         | <b>C) ALT activity</b> |         |
|-------------------------------------------|-------------------------|----------|------------------------------|---------|------------------------|---------|
| Source of Variation                       | % of total variation    | P value  | % of total variation         | P value | % of total variation   | P value |
| Interaction                               | 16,66                   | 0,0007   | 8,914                        | 0,1122  | 8,914                  | 0,1122  |
| Genotype (WT/ <i>Fxr</i> <sup>-/-</sup> ) | 12,88                   | 0,0023   | 11,68                        | 0,0719  | 11,68                  | 0,0719  |
| Colonization (GF/CONV-R)                  | 32,68                   | < 0,0001 | 19,35                        | 0,024   | 19,35                  | 0,024   |

| <b>Figure 3</b>                           | <b>D) <i>Cd36</i> mRNA levels</b> |         | <b>E) <i>Apo-C II</i> mRNA levels</b> |         | <b>F) <i>Vldlr</i> mRNA levels</b> |         |
|-------------------------------------------|-----------------------------------|---------|---------------------------------------|---------|------------------------------------|---------|
| Source of Variation                       | % of total variation              | P value | % of total variation                  | P value | % of total variation               | P value |
| Interaction                               | 10,76                             | 0,0607  | 10,76                                 | 0,0607  | 6,446                              | 0,068   |
| Genotype (WT/ <i>Fxr</i> <sup>-/-</sup> ) | 0,736                             | 0,6096  | 0,736                                 | 0,6096  | 12,83                              | 0,0127  |
| Colonization (GF/CONV-R)                  | 31,08                             | 0,0029  | 31,08                                 | 0,0029  | 27,55                              | 0,0006  |

| <b>Supp. Figure 1</b>                     | <b>A) <i>Fas</i> mRNA levels</b> |         | <b>B) <i>ACC1</i> mRNA levels</b> |         |
|-------------------------------------------|----------------------------------|---------|-----------------------------------|---------|
| Source of Variation                       | % of total variation             | P value | % of total variation              | P value |
| Interaction                               | 0,09757                          | 0,883   | 7,928                             | 0,115   |
| Genotype (WT/ <i>Fxr</i> <sup>-/-</sup> ) | 1,053                            | 0,6299  | 17,12                             | 0,0245  |
| Colonization (GF/CONV-R)                  | 23,66                            | 0,0327  | 7,33                              | 0,1289  |

All comparisons were made with 2-way ANOVA followed with post hoc Bonferroni post-tests. \* $p < 0.05$ , \*\* $p < 0.01$ , \*\*\* $p < 0.001$ .
